# Supplementary material for: Disordered Patterns in Clustered Protein Data Bank and in Eukaryotic and Bacterial Proteomes
Source: PLoS One. 2011 Nov 4;6(11):e27142. doi: 10.1371/journal.pone.0027142 (PMC3208572; doi:10.1371/journal.pone.0027142)
Supplement: Dataset S2 — Number of proteins and residues for each out of 123 proteomes. (XLS) [file pone.0027142.s002.xls]

## Sheet: 2_500_000
superkingdom	kingdom or rang following superkingdom	phylum	class	order	family	species	name of genom in the database	Number of proteins	Summury length of proteins	Average length of proteins
Eukaryota	Metazoa	Chordata	Mammalia	Primates	Hominidae	Homo sapiens (Human)	25.H_sapiens	51778	20896765	403.584
Eukaryota	Metazoa	Chordata	Mammalia	Ruminantia	Bovidae	Bos taurus (Bovine)	22974.B_taurus	18405	8422976	457.646
Eukaryota	Metazoa	Chordata	Mammalia	Rodentia	Muridae	Mus musculus (Mouse)	59.M_musculus	42120	17954236	426.264
Eukaryota	Metazoa	Chordata	Mammalia	Rodentia	Muridae	Rattus norvegicus (Rat)	122.R_norvegicus	28166	13973712	496.12
Eukaryota	Metazoa	Chordata	Aves	Galliformes	Phasianidae	Gallus gallus (Chicken)	21457.G_gallus	12954	6142807	474.202
Eukaryota	Metazoa	Chordata	Actinopterygii	Cypriniformes	Cyprinidae	Danio rerio (Zebrafish)	20721.D_rerio	21576	9549696	442.607
Eukaryota	Metazoa	Chordata	Actinopterygii	Tetraodontiformes	Tetraodontidae	Tetraodon nigroviridis (Green puffer)	22388.T_nigroviridis	27836	11285777	405.438
Eukaryota	Metazoa	Arthropoda	Insecta	Diptera	Drosophilidae	Drosophila melanogaster (Fruit fly)	17.D_melanogaster	15101	8251562	546.425
Eukaryota	Metazoa	Arthropoda	Insecta	Diptera	Drosophilidae	Drosophila pseudoobscura pseudoobscura (Fruit fly)	25396.D_pseudoobscura	16000	7678897	479.931
Eukaryota	Metazoa	Arthropoda	Insecta	Diptera	Culicidae	Aedes aegypti (Yellowfever mosquito)	31436.A_aegypti	16042	7465189	465.353
Eukaryota	Metazoa	Arthropoda	Insecta	Diptera	Culicidae	Anopheles darlingi (Mosquito)	78607.A_darlingi	11437	5911342	516.861
Eukaryota	Metazoa	Arthropoda	Insecta	Diptera	Culicidae	Anopheles gambiae (African malaria mosquito)	22426.A_gambiae	12455	6041474	485.064
Eukaryota	Metazoa	Nematoda	Chromadorea	Rhabditida	Rhabditidae	Caenorhabditis briggsae	21633.C_briggsae	18531	7528060	406.241
Eukaryota	Metazoa	Nematoda	Chromadorea	Rhabditida	Rhabditidae	Caenorhabditis elegans	9.C_elegans	23817	10278459	431.56
Eukaryota	Metazoa	Nematoda	Chromadorea	Spirurida	Onchocercidae	Loa loa (Eye worm)	64800.L_loa	16271	4820382	296.256
Eukaryota	Metazoa	Nematoda	Enoplea	Trichocephalida	Trichinellidae	Trichinella spiralis (Trichina worm)	79720.T_spiralis	16040	5160918	321.753
Eukaryota	Metazoa	Cnidaria	Anthozoa	Actiniaria	Edwardsiidae	Nematostella vectensis (Starlet sea anemone)	30565.N_vectensis	24435	8260127	338.045
Eukaryota	Viridiplantae	Streptophyta	Liliopsida	Poales	Poaceae	Oryza sativa subsp. japonica (Rice)	23214.O_sativa	48549	17297071	356.281
Eukaryota	Viridiplantae	Streptophyta	Magnoliopsida	Brassicales	Brassicaceae	Arabidopsis thaliana (Mouse-ear cress)	3.A_thaliana	35418	14005154	395.425
Eukaryota	Viridiplantae	Chlorophyta	Prasinophyceae	Mamiellales	-	Micromonas sp. (Picoplanktonic green alga)	33157.Micromonas_sp	10082	4881483	484.178
Eukaryota	Viridiplantae	Chlorophyta	Prasinophyceae	Mamiellales	-	Ostreococcus lucimarinus	29351.O_lucimarinus	7403	2987645	403.572
Eukaryota	Viridiplantae	Chlorophyta	Prasinophyceae	Mamiellales	-	Ostreococcus tauri	25972.O_tauri	7970	3402653	426.933
Eukaryota	Stramenopiles	Heterokontophyta	Phaeophyceae	Ectocarpales	Ectocarpaceae	Ectocarpus siliculosus (Brown alga)	35109.E_siliculosus	12365	6606159	534.263
Eukaryota	Choanoflagellida	-	-	Choanoflagellida	Codonosigidae	Monosiga brevicollis (Choanoflagellate)	30562.M_brevicollis	9188	5511963	599.909
Eukaryota	Euglenozoa	-	-	Kinetoplastida	Trypanosomatidae	Leishmania braziliensis	83400.L_braziliensis	7124	4463673	626.568
Eukaryota	Euglenozoa	-	-	Kinetoplastida	Trypanosomatidae	Leishmania infantum	83363.L_infantum	7359	4577022	621.962
Eukaryota	Euglenozoa	-	-	Kinetoplastida	Trypanosomatidae	Trypanosoma brucei gambiense	71330.T_brucei	9667	4385015	453.607
Eukaryota	Euglenozoa	-	-	Kinetoplastida	Trypanosomatidae	Trypanosoma cruzi	33602.T_cruzi	19242	9670825	502.589
Eukaryota	Alveolata	Apicomplexa	Aconoidasida	Haemosporida	-	Plasmodium berghei (strain Anka)	32114.P_berghei	11656	2837750	243.458
Eukaryota	Alveolata	Apicomplexa	Aconoidasida	Haemosporida	-	Plasmodium chabaudi	31998.P_chabaudi	14615	2835341	194.002
Eukaryota	Alveolata	Apicomplexa	Aconoidasida	Haemosporida	-	Plasmodium falciparum (isolate 3D7)	493.P_falciparum	5353	4077311	761.687
Eukaryota	Alveolata	Apicomplexa	Aconoidasida	Haemosporida	-	Plasmodium knowlesi	31342.P_knowlesi	5100	3704850	726.441
Eukaryota	Alveolata	Apicomplexa	Aconoidasida	Haemosporida	-	Plasmodium vivax	31632.P_vivax	5051	3635375	719.734
Eukaryota	Alveolata	Apicomplexa	Aconoidasida	Haemosporida	-	Plasmodium yoelii yoelii	21631.P_yoelii	7757	3387422	436.692
Eukaryota	Amoebozoa	-	-	Dictyosteliida	-	Dictyostelium discoideum (Slime mold)	21395.D_discoideum	12814	6863046	535.59
Eukaryota	Amoebozoa	-	-	Dictyosteliida	-	Polysphondylium pallidum (Cellular slime mold)	35301.P_pallidum	12351	6385196	516.978
Eukaryota	Diplomonadida	-	-	-	Hexamitidae	Giardia intestinalis (Giardia lamblia)	33600.G_intestinalis_ATCC_50803	7154	3226547	451.013
Eukaryota	Diplomonadida	-	-	-	Hexamitidae	Giardia intestinalis (Giardia lamblia)	35295.G_intestinalis_ATCC_50581	4466	2731027	611.515
Eukaryota	Diplomonadida	-	-	-	Hexamitidae	Giardia lamblia	65115.G_intestinalis	4998	3057358	611.716
Eukaryota	Fungi	Ascomycota	Dothideomycetes	Pleosporales	Phaeosphaeriaceae	Phaeosphaeria nodorum (Glume blotch fungus)	25591.P_nodorum	15994	6076358	379.915
Eukaryota	Fungi	Ascomycota	Dothideomycetes	Pleosporales	Pleosporaceae	Pyrenophora teres f. teres (Barley net blotch fungus)	79905.P_teres	11705	5424802	463.46
Eukaryota	Fungi	Ascomycota	Eurotiomycetes	Eurotiales	Trichocomaceae	Aspergillus clavatus	29154.A_clavatus	9120	4501393	493.574
Eukaryota	Fungi	Ascomycota	Eurotiomycetes	Eurotiales	Trichocomaceae	Aspergillus flavus	33020.A_flavus	13484	5671546	420.613
Eukaryota	Fungi	Ascomycota	Eurotiomycetes	Eurotiales	Trichocomaceae	Aspergillus fumigatus (Sartorya fumigata)	22118.A_fumigatus_FGSC_A1100	9629	4736936	491.945
Eukaryota	Fungi	Ascomycota	Eurotiomycetes	Eurotiales	Trichocomaceae	Aspergillus fumigatus (Sartorya fumigata)	31018.A_fumigatus_CEA10	9923	4798490	483.573
Eukaryota	Fungi	Ascomycota	Eurotiomycetes	Eurotiales	Trichocomaceae	Aspergillus niger	29130.A_niger	14090	6197691	439.865
Eukaryota	Fungi	Ascomycota	Eurotiomycetes	Eurotiales	Trichocomaceae	Aspergillus oryzae	23077.A_oryzae	12055	5414440	449.145
Eukaryota	Fungi	Ascomycota	Eurotiomycetes	Eurotiales	Trichocomaceae	Aspergillus terreus	28239.A_terreus	10401	5193039	499.283
Eukaryota	Fungi	Ascomycota	Eurotiomycetes	Eurotiales	Trichocomaceae	Neosartorya fischeri (Aspergillus fischerianus)	29157.N_fischeri	10392	5071894	488.058
Eukaryota	Fungi	Ascomycota	Eurotiomycetes	Eurotiales	Trichocomaceae	Penicillium chrysogenum	31898.P_chrysogenum	12773	5701924	446.404
Eukaryota	Fungi	Ascomycota	Eurotiomycetes	Eurotiales	Trichocomaceae	Penicillium marneffei	32999.P_marneffei	10447	5284948	505.882
Eukaryota	Fungi	Ascomycota	Eurotiomycetes	Eurotiales	Trichocomaceae	Talaromyces stipitatus (Penicillium stipitatum)	33056.T_stipitatus	12996	6257506	481.495
Eukaryota	Fungi	Ascomycota	Eurotiomycetes	Onygenales	-	Coccidioides posadasii (Valley fever fungus)	34218.C_posadasii	7226	3772036	522.009
Eukaryota	Fungi	Ascomycota	Eurotiomycetes	Onygenales	-	Paracoccidioides brasiliensis	34307.P_brasiliensis_Pb03	7872	3754082	476.89
Eukaryota	Fungi	Ascomycota	Eurotiomycetes	Onygenales	-	Paracoccidioides brasiliensis	34389.P_brasiliensis_Pb18	8748	3914676	447.494
Eukaryota	Fungi	Ascomycota	Eurotiomycetes	Onygenales	-	Paracoccidioides brasiliensis	34392.P_brasiliensis_ATCC_MYA-826	9114	4033428	442.553
Eukaryota	Fungi	Ascomycota	Eurotiomycetes	Onygenales	Ajellomycetaceae	Ajellomyces capsulata (Darling's disease fungus) (Histoplasma capsulatum)	34310.A_capsulata_ATCC_26029	9214	4155713	451.022
Eukaryota	Fungi	Ascomycota	Eurotiomycetes	Onygenales	Ajellomycetaceae	Ajellomyces capsulata (Darling's disease fungus) (Histoplasma capsulatum)	34967.A_capsulata_H143	9545	3861551	404.563
Eukaryota	Fungi	Ascomycota	Eurotiomycetes	Onygenales	Ajellomycetaceae	Ajellomyces dermatitidis (Blastomyces dermatitidis)	34495.A_dermatitidis_SLH14081	9587	4297530	448.266
Eukaryota	Fungi	Ascomycota	Eurotiomycetes	Onygenales	Ajellomycetaceae	Ajellomyces dermatitidis (Blastomyces dermatitidis)	34498.A_dermatitidis_ER-3	9539	4283586	449.06
Eukaryota	Fungi	Ascomycota	Eurotiomycetes	Onygenales	Arthrodermataceae	Arthroderma benhamiae (Trichophyton mentagrophytes)	35919.A_benhamiae	7979	3935999	493.295
Eukaryota	Fungi	Ascomycota	Eurotiomycetes	Onygenales	Arthrodermataceae	Nannizzia otae (Microsporum canis) (Arthroderma otae)	34471.N_otae	8764	4258616	485.921
Eukaryota	Fungi	Ascomycota	Eurotiomycetes	Onygenales	Arthrodermataceae	Trichophyton verrucosum	35921.T_verrucosum	8028	3923203	488.69
Eukaryota	Fungi	Ascomycota	Eurotiomycetes	Onygenales	Onygenaceae	Uncinocarpus reesii	34386.U_reesii	7760	3724604	479.975
Eukaryota	Fungi	Ascomycota	Leotiomycetes	Helotiales	Sclerotiniaceae	Botryotinia fuckeliana (Noble rot fungus) (Botrytis cinerea)	30100.B_fuckeliana	16365	5484827	335.156
Eukaryota	Fungi	Ascomycota	Leotiomycetes	Helotiales	Sclerotiniaceae	Sclerotinia sclerotiorum (White mold)	30103.S_sclerotiorum	14400	5227906	363.049
Eukaryota	Fungi	Ascomycota	Saccharomycetes	Saccharomycetales	-	Candida albicans (Yeast)	22024.C_albicans_SC5314	9134	3851883	421.708
Eukaryota	Fungi	Ascomycota	Saccharomycetes	Saccharomycetales	-	Candida dubliniensis (Yeast)	32738.C_dubliniensis	5828	2959529	507.812
Eukaryota	Fungi	Ascomycota	Saccharomycetes	Saccharomycetales	-	Candida glabrata (Yeast)	19665.C_glabrata	5197	2633167	506.671
Eukaryota	Fungi	Ascomycota	Saccharomycetes	Saccharomycetales	-	Candida tropicalis (Yeast)	34491.C_tropicalis	6226	3018678	484.85
Eukaryota	Fungi	Ascomycota	Saccharomycetes	Saccharomycetales	Debaryomycetaceae	Debaryomyces hansenii (Yeast)	20018.D_hansenii	6242	2994541	479.741
Eukaryota	Fungi	Ascomycota	Saccharomycetes	Saccharomycetales	Debaryomycetaceae	Lodderomyces elongisporus (Yeast)	29447.L_elongisporus	5779	2942658	509.198
Eukaryota	Fungi	Ascomycota	Saccharomycetes	Saccharomycetales	Debaryomycetaceae	Pichia guilliermondii (Yeast)	29448.P_guilliermondii	5918	2761683	466.658
Eukaryota	Fungi	Ascomycota	Saccharomycetes	Saccharomycetales	Debaryomycetaceae	Pichia stipitis (Yeast)	28727.P_stipitis	5796	2850827	491.861
Eukaryota	Fungi	Ascomycota	Saccharomycetes	Saccharomycetales	Dipodascaceae	Yarrowia lipolytica (Candida lipolytica)	20011.Y_lipolytica	6414	3092367	482.128
Eukaryota	Fungi	Ascomycota	Saccharomycetes	Saccharomycetales	Metschnikowiaceae	Clavispora lusitaniae (Yeast) (Candida lusitaniae)	34493.C_lusitaniae	5932	2742050	462.247
Eukaryota	Fungi	Ascomycota	Saccharomycetes	Saccharomycetales	Saccharomycetaceae	Lachancea thermotolerans (Yeast) (Kluyveromyces thermotolerans)	34482.L_thermotolerans	5093	2500276	490.924
Eukaryota	Fungi	Ascomycota	Saccharomycetes	Saccharomycetales	Saccharomycetaceae	Saccharomyces cerevisiae (Baker's yeast)	30091.S_cerevisiae_YJM789	5861	2834800	483.672
Eukaryota	Fungi	Ascomycota	Saccharomycetes	Saccharomycetales	Saccharomycetaceae	Saccharomyces cerevisiae (Baker's yeast)	31651.S_cerevisiae_RM11-1a	5357	2544797	475.041
Eukaryota	Fungi	Ascomycota	Saccharomycetes	Saccharomycetales	Saccharomycetaceae	Saccharomyces cerevisiae (Baker's yeast)	34506.S_cerevisiae_JAY291	5193	2558636	492.709
Eukaryota	Fungi	Ascomycota	Saccharomycetes	Saccharomycetales	Saccharomycetaceae	Saccharomyces cerevisiae (Baker's yeast)	35062.S_cerevisiae_Lalvin_EC1118	5982	2661132	444.857
Eukaryota	Fungi	Ascomycota	Saccharomycetes	Saccharomycetales	Saccharomycetaceae	Saccharomyces cerevisiae (Baker's yeast)	71242.S_cerevisiae	5836	2895873	496.209
Eukaryota	Fungi	Ascomycota	Saccharomycetes	Saccharomycetales	Saccharomycetaceae	Vanderwaltozyma polyspora (Kluyveromyces polysporus)	30097.V_polyspora	5353	2697592	503.94
Eukaryota	Fungi	Ascomycota	Sordariomycetes	Glomerellales	Glomerellaceae	Colletotrichum graminicola (Maize anthracnose fungus) (Glomerella graminicola)	79902.C_graminicola	12019	5585661	464.736
Eukaryota	Fungi	Ascomycota	Sordariomycetes	Glomerellales	Plectosphaerellaceae	Verticillium albo-atrum (Verticillium wilt)	35359.V_albo-atrum	10233	4470746	436.895
Eukaryota	Fungi	Ascomycota	Sordariomycetes	Hypocreales	Nectriaceae	Nectria haematococca (Fusarium solani subsp. pisi)	34970.N_haematococca	15679	7523999	479.877
Eukaryota	Fungi	Ascomycota	Sordariomycetes	Magnaporthales	Magnaporthaceae	Magnaporthe oryzae (Rice blast fungus)	22028.M_oryzae	12684	5579423	439.879
Eukaryota	Fungi	Ascomycota	Sordariomycetes	Sordariales	Chaetomiaceae	Chaetomium globosum (Soil fungus)	25585.C_globosum_IFO_6347	11041	5473748	495.766
Eukaryota	Fungi	Ascomycota	Sordariomycetes	Sordariales	Sordariaceae	Neurospora crassa	22025.N_crassa	9815	4773313	486.328
Eukaryota	Fungi	Ascomycota	Sordariomycetes	Sordariales	Sordariaceae	Sordaria macrospora	35280.S_macrospora	10819	5135442	474.669
Eukaryota	Fungi	Basidiomycota	-	Pucciniales	Pucciniaceae	Puccinia graminis f. sp. tritici (Black stem rust fungus)	79908.P_graminis	20437	7532385	368.566
Eukaryota	Fungi	Basidiomycota	Agaricomycetes	Agaricales	Psathyrellaceae	Coprinopsis cinerea (Inky cap fungus) (Hormographiella aspergillata)	31020.C_cinerea	13335	6160676	461.993
Eukaryota	Fungi	Basidiomycota	Agaricomycetes	Agaricales	Tricholomataceae	Laccaria bicolor (Bicoloured deceiver)	31023.L_bicolor	17895	6645138	371.34
Eukaryota	Fungi	Basidiomycota	Agaricomycetes	Polyporales	Coriolaceae	Postia placenta (Brown rot fungus) (Poria monticola)	33031.P_placenta	8983	3900308	434.188
Eukaryota	Fungi	Basidiomycota	Tremellomycetes	Tremellales	Tremellaceae	Cryptococcus neoformans (Filobasidiella neoformans)	20846.C_neoformans_JEC21	6436	3446704	535.535
Eukaryota	Fungi	Basidiomycota	Tremellomycetes	Tremellales	Tremellaceae	Cryptococcus neoformans (Filobasidiella neoformans)	21380.C_neoformans_B-3501A	6569	3558673	541.737
Eukaryota	Fungi	Basidiomycota	Ustilaginomycetes	Ustilaginales	Ustilaginaceae	Ustilago maydis (Smut fungus)	22029.U_maydis	6548	4000884	611.009
Bacteria	Acidobacteria	Acidobacteria	Solibacteres	Solibacterales	Solibacteraceae	Solibacter usitatus	25797.S_usitatus	7761	2980018	383.973
Bacteria	Actinobacteria	Actinobacteria	Actinobacteria	Actinomycetales	Catenulisporaceae	Catenulispora acidiphila	33926.C_acidiphila	8909	3085666	346.354
Bacteria	Actinobacteria	Actinobacteria	Actinobacteria	Actinomycetales	Frankiaceae	Frankia sp.	35278.Frankia_sp_EuI1c	7079	2517300	355.601
Bacteria	Actinobacteria	Actinobacteria	Actinobacteria	Actinomycetales	Frankiaceae	Frankia sp.	35534.F_sp	8161	2648031	324.474
Bacteria	Actinobacteria	Actinobacteria	Actinobacteria	Actinomycetales	Nocardiaceae	Rhodococcus opacus	33113.R_opacus	8170	2646977	323.987
Bacteria	Actinobacteria	Actinobacteria	Actinobacteria	Actinomycetales	Nocardiaceae	Rhodococcus sp.	25456.Rhodococcus_sp	9075	2871140	316.379
Bacteria	Actinobacteria	Actinobacteria	Actinobacteria	Actinomycetales	Pseudonocardiaceae	Amycolatopsis mediterranei	37022.A_mediterranei	9204	3031617	329.38
Bacteria	Actinobacteria	Actinobacteria	Actinobacteria	Actinomycetales	Streptomycetaceae	Kitasatospora setae (Streptomyces setae)	74443.K_setae	7443	2504147	336.443
Bacteria	Actinobacteria	Actinobacteria	Actinobacteria	Actinomycetales	Streptomycetaceae	Streptomyces avermitilis	131.S_avermitilis	7664	2610184	340.577
Bacteria	Actinobacteria	Actinobacteria	Actinobacteria	Actinomycetales	Streptomycetaceae	Streptomyces bingchenggensis	36666.S_bingchenggensis	10019	3433066	342.656
Bacteria	Actinobacteria	Actinobacteria	Actinobacteria	Actinomycetales	Streptomycetaceae	Streptomyces coelicolor	84.S_coelicolor	8038	2629380	327.119
Bacteria	Actinobacteria	Actinobacteria	Actinobacteria	Actinomycetales	Streptomycetaceae	Streptomyces scabies (Streptomyces scabiei)	34910.S_scabies	8700	2906667	334.1
Bacteria	Actinobacteria	Actinobacteria	Actinobacteria	Actinomycetales	Streptomycetaceae	Streptomyces sp.	35554.S_sp_ACT-1	7379	2508406	339.938
Bacteria	Actinobacteria	Actinobacteria	Actinobacteria	Actinomycetales	Streptomycetaceae	Streptomyces violaceusniger	58962.S_violaceusniger	9484	3201844	337.605
Bacteria	Actinobacteria	Actinobacteria	Actinobacteria	Actinomycetales	Streptosporangiaceae	Streptosporangium roseum	34011.S_roseum	8926	2943041	329.716
Bacteria	Proteobacteria	Proteobacteria	Alphaproteobacteria	Rhizobiales	Bradyrhizobiaceae	Bradyrhizobium japonicum	112.B_japonicum	8253	2616482	317.034
Bacteria	Proteobacteria	Proteobacteria	Betaproteobacteria	Burkholderiales	Burkholderiaceae	Burkholderia sp.	22343.Burkholderia_sp_ATCC_17760	7715	2519373	326.555
Bacteria	Proteobacteria	Proteobacteria	Betaproteobacteria	Burkholderiales	Burkholderiaceae	Burkholderia xenovorans	25388.B_xenovorans	8591	2754203	320.592
Bacteria	Proteobacteria	Proteobacteria	Deltaproteobacteria	Myxococcales	Cystobacteraceae	Stigmatella aurantiaca	33616.S_aurantiaca	8307	3100399	373.227
Bacteria	Proteobacteria	Proteobacteria	Deltaproteobacteria	Myxococcales	Haliangiaceae	Haliangium ochraceum	33223.H_ochraceum	6684	2756058	412.337
Bacteria	Proteobacteria	Proteobacteria	Deltaproteobacteria	Myxococcales	Myxococcaceae	Myxococcus xanthus	23351.M_xanthus	7314	2775111	379.425
Bacteria	Proteobacteria	Proteobacteria	Deltaproteobacteria	Myxococcales	Nannocystaceae	Plesiocystis pacifica SIR-1	32044.P_pacifica	8437	3147198	373.023
Bacteria	Proteobacteria	Proteobacteria	Deltaproteobacteria	Myxococcales	Polyangiaceae	Sorangium cellulosum (Polyangium cellulosum)	30295.S_cellulosum	9320	3743072	401.617
Bacteria	Bacteroidetes	Bacteroidetes	Sphingobacteria	Sphingobacteriales	Chitinophagaceae	Chitinophaga pinensis	33930.C_pinensis	7179	2679304	373.214
Bacteria	Bacteroidetes	Bacteroidetes	Cytophagia	Cytophagales	Cytophagaceae	Microscilla marina	32144.M_marina	8249	2646913	320.877
Bacteria	Chloroflexi	Chloroflexi	Ktedonobacteria	Ktedonobacterales	Ktedonobacteraceae	Ktedonobacter racemifer	36622.K_racemifer	11211	3395074	302.834
